# Supplementary material for: A two-phase binning algorithm using l-mer frequency on groups of non-overlapping reads
Source: PubMed Central journal article supplement (PMC4304631; doi:10.1186/s13015-014-0030-4), 2015-01-16
Supplement: 13015_2014_30_MOESM1_ESM.pdf [file 13015_2014_30_MOESM1_ESM.pdf]

# Supplementary Materials 1

The details of datasets and results for the observation of *l*-mer frequency distribution on groups of non-overlapping reads.

## Table of Contents

1. Details of the tests on pairs of genomes at Genus level
2. Details of the tests on pairs of genomes at Family level
3. Details of the tests on pairs of genomes at Species level

### 1. Details of the tests on pairs of genomes at Genus level

| Pairs | Species/Strains                                     | Euclidean distance |
|-------|-----------------------------------------------------|--------------------|
| 1     | Arthrobacter aurescens TC1                          | 0.00129205         |
|       | Aromatoleum aromaticum EbN1                         |                    |
| 2     | Acidithiobacillus caldus SM-1                       | 0.000969298        |
|       | Acidithiobacillus ferrivorans SS3                   |                    |
| 3     | Acinetobacter baumannii TCDC-AB0715                 | 0.000881397        |
|       | Acinetobacter calcoaceticus PHEA-2                  |                    |
| 4     | Acinetobacter baumannii TCDC-AB0715                 | 0.000592282        |
|       | Acinetobacter oleivorans DR1                        |                    |
| 5     | Acinetobacter oleivorans DR1                        | 0.000651503        |
|       | Acinetobacter calcoaceticus PHEA-2                  |                    |
| 6     | Actinobacillus pleuropneumoniae serovar 3 str. JL03 | 0.000545567        |
|       | Actinobacillus succinogenes 130Z                    |                    |
| 7     | Clostridium tetani E88                              | 0.00137322         |
|       | Clostridium thermocellum ATCC 27405                 |                    |
| 8     | Corynebacterium aurimucosum ATCC 700975             | 0.00132225         |
|       | Corynebacterium diphtheriae 241                     |                    |
| 9     | Clostridium acetobutylicum ATCC 824                 | 0.00190094         |
|       | Clostridium beijerinckii NCIMB 8052                 |                    |
| 10    | Clostridium beijerinckii NCIMB 8052                 | 0.00237113         |
|       | Clostridium botulinum A str. ATCC 19397             |                    |
| 11    | Clostridium botulinum H04402 065                    | 0.000733144        |
|       | Clostridium cellulolyticum H10                      |                    |
| 12    | Clostridium clariflavum DSM 19732                   | 0.00331292         |
|       | Clostridium difficile 2007855                       |                    |
| 13    | Clostridium difficile 2007855                       | 0.000468002        |

|    |                                                             |             |
|----|-------------------------------------------------------------|-------------|
|    | Clostridium kluyveri DSM 555                                |             |
| 14 | Clostridium kluyveri DSM 555                                | 0.000512852 |
|    | Clostridium lentocellum DSM 5427                            |             |
| 15 | Ehrlichia canis str. Jake                                   | 0.000222824 |
|    | Ehrlichia chaffeensis str. Arkansas                         |             |
| 16 | Ehrlichia chaffeensis str. Arkansas                         | 0.00144952  |
|    | Ehrlichia ruminantium str. Gardel                           |             |
| 17 | Enterobacter aerogenes KCTC 2190                            | 0.000846188 |
|    | Enterobacter asburiae LF7a                                  |             |
| 18 | Enterobacter cloacae EcWSU1                                 | 0.0006097   |
|    | Enterobacter asburiae LF7a                                  |             |
| 19 | Leuconostoc kimchii IMSNU 11154                             | 0.00137863  |
|    | Leuconostoc mesenteroides<br>subsp. mesenteroides ATCC 8293 |             |
| 20 | Lactobacillus amylovorus GRL 1112                           | 0.00130382  |
|    | Lactobacillus brevis ATCC 367                               |             |
| 21 | Ferrimonas balearica DSM 9799                               | 0.00520908  |
|    | Ferroglobus placidus DSM 10642                              |             |
| 22 | Fervidicoccus fontis Kam940                                 | 0.00723474  |
|    | Ferrimonas balearica DSM 9799                               |             |
| 23 | Fervidobacterium nodosum Rt17-B1                            | 0.000971573 |
|    | Fervidobacterium pennivorans DSM 9078                       |             |
| 24 | Frankia alni ACN14a                                         | 0.000624341 |
|    | Frankia symbiont of Datisca glomerata                       |             |
| 25 | Flavobacterium branchiophilum FL-15                         | 0.0025518   |
|    | Flavobacterium columnare ATCC 49512                         |             |
| 26 | Flavobacterium columnare ATCC 49512                         | 0.000794538 |
|    | Flavobacterium indicum GPTSA100-9                           |             |
| 27 | Flavobacterium psychrophilum JIP02/86                       | 0.000579774 |
|    | Flavobacterium indicum GPTSA100-9                           |             |
| 28 | Francisella cf. novicida Fx1                                | 0.00122829  |
|    | Francisella noatunensis subsp. orientalis str. Toba 04      |             |
| 29 | Francisella noatunensis<br>subsp. orientalis str. Toba 04   | 0.000463824 |
|    | Francisella philomiragia<br>subsp. philomiragia ATCC 25017  |             |
| 30 | Francisella philomiragia<br>subsp. philomiragia ATCC 25017  | 0.000382518 |
|    | Francisella cf. novicida Fx1                                |             |
| 31 | Gallibacterium anatis UMN179                                | 0.00510855  |
|    | Gallionella capsiferriformans ES-2                          |             |

|                         |                                          |                    |
|-------------------------|------------------------------------------|--------------------|
| 32                      | Geobacillus kaustophilus HTA426          | 0.000392288        |
|                         | Geobacillus sp. C56-T3                   |                    |
| 33                      | Geobacillus sp. C56-T3                   | 0.000328194        |
|                         | Geobacillus thermodenitrificans NG80-2   |                    |
| 34                      | Geobacillus thermodenitrificans NG80-2   | 0.000816751        |
|                         | Geobacillus thermoglucosidasius C56-YS93 |                    |
| 35                      | Geobacillus thermoglucosidasius C56-YS93 | 0.00184899         |
|                         | Geobacillus thermoleovorans CCB_US3_UF5  |                    |
| 36                      | Geobacter lovleyi SZ                     | 0.00580897         |
|                         | Geobacter metallireducens GS-15          |                    |
| 37                      | Geobacter metallireducens GS-15          | 0.00213207         |
|                         | Geobacter sp. FRC-32                     |                    |
| 38                      | Geobacter sp. FRC-32                     | 0.00307431         |
|                         | Geobacter sulfurreducens KN400           |                    |
| 39                      | Haemophilus influenzae Rd KW20           | 0.000582075        |
|                         | Haemophilus parainfluenzae T3T1          |                    |
| 40                      | Haemophilus parainfluenzae T3T1          | 0.000464351        |
|                         | Haemophilus parasuis SH0165              |                    |
| 41                      | Rhodobacter capsulatus SB 1003           | 0.00100538         |
|                         | Rhodobacter sphaeroides 2.4.1            |                    |
| 42                      | Rickettsia heilongjiangensis 054         | 0.000362156        |
|                         | Rickettsia massiliae MTU5                |                    |
| 43                      | Rickettsia peacockii str. Rustic         | 0.00116132         |
|                         | Rickettsia prowazekii Rp22               |                    |
| 44                      | Roseiflexus castenholzii DSM 13941       | 0.000437446        |
|                         | Roseiflexus sp. RS-1                     |                    |
| 45                      | Roseobacter denitrificans OCh 114        | 0.000435788        |
|                         | Roseobacter litoralis Och 149            |                    |
| 46                      | Ruegeria pomeroyi DSS-3                  | 0.000974478        |
|                         | Ruegeria sp. TM1040                      |                    |
| 47                      | Salinisporea arenicola CNS-205           | 0.000597411        |
|                         | Salinisporea tropica CNB-440             |                    |
| 48                      | Shewanella amazonensis SB2B              | 0.00118549         |
|                         | Shewanella baltica BA175                 |                    |
| 49                      | Sinorhizobium medicae WSM419             | 0.000465572        |
|                         | Sinorhizobium meliloti 1021              |                    |
| 50                      | Streptococcus suis ST3                   | 0.000983104        |
|                         | Streptococcus thermophilus ND03          |                    |
| <b>Average distance</b> |                                          | <b>0.001418848</b> |

## 2. Details of the tests on pairs of genomes at Family level

| <b>Pairs</b> | <b>Species/Strains</b>               | <b>Euclidean distance</b> |
|--------------|--------------------------------------|---------------------------|
| 1            | Acidiphilium cryptum JF-5            | 0.00116041                |
|              | Azospirillum lipoferum 4B            |                           |
| 2            | Acidiphilium cryptum JF-5            | 0.00128279                |
|              | Azospirillum sp. B510                |                           |
| 3            | Acidiphilium cryptum JF-5            | 0.000960068               |
|              | Rhodospirillum centenum SW           |                           |
| 4            | Acidiphilium cryptum JF-5            | 0.0056813                 |
|              | Rhodospirillum photometricum DSM 122 |                           |
| 5            | Acidiphilium cryptum JF-5            | 0.000900461               |
|              | Rhodospirillum rubrum F11            |                           |
| 6            | Acidiphilium multivorum AIU301       | 0.00119024                |
|              | Azospirillum lipoferum 4B            |                           |
| 7            | Acidiphilium multivorum AIU301       | 0.00130401                |
|              | Azospirillum sp. B510                |                           |
| 8            | Acidiphilium multivorum AIU301       | 0.000981188               |
|              | Rhodospirillum centenum SW           |                           |
| 9            | Acidiphilium multivorum AIU301       | 0.00566501                |
|              | Rhodospirillum photometricum DSM 122 |                           |
| 10           | Acidiphilium multivorum AIU301       | 0.000905204               |
|              | Rhodospirillum rubrum F11            |                           |
| 11           | Gluconobacter oxydans 621H           | 0.00272485                |
|              | Magnetospirillum magneticum AMB-1    |                           |
| 12           | Gluconobacter oxydans 621H           | 0.00244248                |
|              | Azospirillum lipoferum 4B            |                           |
| 13           | Gluconobacter oxydans 621H           | 0.00428762                |
|              | Azospirillum sp. B510                |                           |
| 14           | Gluconobacter oxydans 621H           | 0.00195362                |
|              | Rhodospirillum centenum SW           |                           |
| 15           | Gluconobacter oxydans 621H           | 0.00187092                |
|              | Rhodospirillum photometricum DSM 122 |                           |
| 16           | Gluconacetobacter xylinus NBRC 3288  | 0.00160728                |
|              | Magnetospirillum magneticum AMB-1    |                           |
| 17           | Gluconacetobacter xylinus NBRC 3288  | 0.00187295                |
|              | Azospirillum lipoferum 4B            |                           |
| 18           | Gluconacetobacter xylinus NBRC 3288  | 0.00267678                |
|              | Azospirillum sp. B510                |                           |
| 19           | Gluconacetobacter xylinus NBRC 3288  | 0.00176704                |

|    |                                         |            |
|----|-----------------------------------------|------------|
|    | Rhodospirillum centenum SW              |            |
| 20 | Gluconacetobacter xylinus NBRC 3288     | 0.00364943 |
|    | Rhodospirillum photometricum DSM 122    |            |
| 21 | Helicobacter pylori v225d               | 0.001695   |
|    | Campylobacter concisus 13826            |            |
| 22 | Helicobacter pylori v225d               | 0.00288986 |
|    | Campylobacter curvus 525.92             |            |
| 23 | Helicobacter pylori v225d               | 0.00233894 |
|    | Campylobacter fetus subsp. fetus 82-40  |            |
| 24 | Helicobacter pylori v225d               | 0.0029078  |
|    | Campylobacter hominis ATCC BAA-381      |            |
| 25 | Helicobacter pylori v225d               | 0.0023106  |
|    | Campylobacter jejuni RM1221             |            |
| 26 | Helicobacter acinonychis str. Sheeba    | 0.00260565 |
|    | Campylobacter concisus 13826            |            |
| 27 | Helicobacter acinonychis str. Sheeba    | 0.00512735 |
|    | Campylobacter curvus 525.92             |            |
| 28 | Helicobacter acinonychis str. Sheeba    | 0.00218291 |
|    | Campylobacter fetus subsp. fetus 82-40  |            |
| 29 | Helicobacter acinonychis str. Sheeba    | 0.00160544 |
|    | Campylobacter hominis ATCC BAA-381      |            |
| 30 | Helicobacter acinonychis str. Sheeba    | 0.00138367 |
|    | Campylobacter jejuni RM1221             |            |
| 31 | Mycobacterium tuberculosis CCDC5079     | 0.00121954 |
|    | Corynebacterium aurimucosum ATCC 700975 |            |
| 32 | Mycobacterium tuberculosis CCDC5079     | 0.0022096  |
|    | Corynebacterium diphtheriae 241         |            |
| 33 | Mycobacterium tuberculosis CCDC5079     | 0.00194272 |
|    | Corynebacterium efficiens YS-314        |            |
| 34 | Mycobacterium tuberculosis CCDC5079     | 0.00305287 |
|    | Corynebacterium glutamicum ATCC 13032   |            |
| 35 | Mycobacterium tuberculosis CCDC5079     | 0.00130545 |
|    | Corynebacterium jeikeium K411           |            |
| 36 | Mycobacterium ulcerans Agy99            | 0.00130113 |
|    | Corynebacterium aurimucosum ATCC 700975 |            |
| 37 | Mycobacterium ulcerans Agy99            | 0.00275419 |
|    | Corynebacterium diphtheriae 241         |            |
| 38 | Mycobacterium ulcerans Agy99            | 0.00188054 |
|    | Corynebacterium efficiens YS-314        |            |
| 39 | Mycobacterium ulcerans Agy99            | 0.0038878  |
|    | Corynebacterium glutamicum ATCC 13032   |            |

|                         |                                                             |                    |
|-------------------------|-------------------------------------------------------------|--------------------|
| 40                      | Mycobacterium ulcerans Agy99                                | 0.00160739         |
|                         | Corynebacterium jeikeium K411                               |                    |
| 41                      | Rhodococcus erythropolis PR4                                | 0.00144254         |
|                         | Mycobacterium abscessus                                     |                    |
| 42                      | Rhodococcus erythropolis PR4                                | 0.00175072         |
|                         | Mycobacterium africanum GM041182                            |                    |
| 43                      | Rhodococcus erythropolis PR4                                | 0.00245791         |
|                         | Mycobacterium avium 104                                     |                    |
| 44                      | Rhodococcus erythropolis PR4                                | 0.00177895         |
|                         | Mycobacterium bovis AF2122/97                               |                    |
| 45                      | Rhodococcus erythropolis PR4                                | 0.00178442         |
|                         | Mycobacterium canettii CIPT 140010059                       |                    |
| 46                      | Rhodococcus jostii RHA1                                     | 0.000571187        |
|                         | Mycobacterium chubuense NBB4                                |                    |
| 47                      | Rhodococcus jostii RHA1                                     | 0.0033827          |
|                         | Clavibacter michiganensis<br>subsp. michiganensis NCPPB 382 |                    |
| 48                      | Rhodococcus jostii RHA1                                     | 0.00266907         |
|                         | Clavibacter michiganensis<br>subsp. sepedonicus             |                    |
| 49                      | Rhodococcus jostii RHA1                                     | 0.00144297         |
|                         | Microbacterium testaceum StLB037                            |                    |
| 50                      | Rhodococcus jostii RHA1                                     | 0.000791016        |
|                         | Mycobacterium avium 104                                     |                    |
| <b>Average distance</b> |                                                             | <b>0.002183272</b> |

### 3. Details of the tests on pairs of genomes at Species level

| <b>Pairs</b> | <b>Species/Strains</b>                                 | <b>Euclide distance</b> |
|--------------|--------------------------------------------------------|-------------------------|
| 1            | Arthrobacter aurescens TC1                             | 0.000402109             |
| 2            | Acidithiobacillus caldus SM-1                          | 0.000338735             |
| 3            | Acinetobacter baumannii TCDC-AB0715                    | 0.000427445             |
| 4            | Acinetobacter oleivorans DR1                           | 0.000481165             |
| 5            | Acinetobacter calcoaceticus PHEA-2                     | 0.00504832              |
| 6            | Actinobacillus pleuropneumoniae<br>serovar 3 str. JL03 | 0.000593606             |
| 7            | Clostridium tetani E88                                 | 0.00178746              |

|    |                                                                          |             |
|----|--------------------------------------------------------------------------|-------------|
| 8  | <i>Corynebacterium aurimucosum</i> ATCC 700975                           | 0.000361758 |
| 9  | <i>Clostridium acetobutylicum</i> ATCC 824                               | 0.000435955 |
| 10 | <i>Clostridium beijerinckii</i> NCIMB 8052                               | 0.00101003  |
| 11 | <i>Clostridium botulinum</i> H04402 065                                  | 0.00199109  |
| 12 | <i>Clostridium clariflavum</i> DSM 19732                                 | 0.000659139 |
| 13 | <i>Clostridium difficile</i> 2007855                                     | 0.00209873  |
| 14 | <i>Clostridium kluyveri</i> DSM 555                                      | 0.000273998 |
| 15 | <i>Ehrlichia canis</i> str. Jake                                         | 0.000517377 |
| 16 | <i>Ehrlichia chaffeensis</i> str. Arkansas                               | 0.000276004 |
| 17 | <i>Enterobacter aerogenes</i> KCTC 2190                                  | 0.000913663 |
| 18 | <i>Enterobacter cloacae</i> EcWSU1                                       | 0.000610972 |
| 19 | <i>Leuconostoc kimchii</i> IMSNU 11154                                   | 0.000384086 |
| 20 | <i>Lactobacillus amylovorus</i> GRL 1112                                 | 0.00159008  |
| 21 | <i>Ferrimonas balearica</i> DSM 9799                                     | 0.000662443 |
| 22 | <i>Fervidicoccus fontis</i> Kam940                                       | 0.000835274 |
| 23 | <i>Fervidobacterium nodosum</i> Rt17-B1                                  | 0.000359662 |
| 24 | <i>Frankia alni</i> ACN14a                                               | 0.000511451 |
| 25 | <i>Flavobacterium branchiophilum</i> FL-15                               | 0.000794795 |
| 26 | <i>Flavobacterium columnare</i> ATCC 49512                               | 0.00115145  |
| 27 | <i>Flavobacterium psychrophilum</i> JIP02/86                             | 0.00162949  |
| 28 | <i>Francisella</i> cf. <i>novicida</i> Fx1                               | 0.00122074  |
| 29 | <i>Francisella noatunensis</i><br>subsp. <i>orientalis</i> str. Toba 04  | 0.000642839 |
| 30 | <i>Francisella philomiragia</i><br>subsp. <i>philomiragia</i> ATCC 25017 | 0.000303487 |
| 31 | <i>Gallibacterium anatis</i> UMN179                                      | 0.000345561 |
| 32 | <i>Geobacillus kaustophilus</i> HTA426                                   | 0.000390449 |
| 33 | <i>Geobacillus</i> sp. C56-T3                                            | 0.000305441 |
| 34 | <i>Geobacillus thermodenitrificans</i> NG80-2                            | 0.000368147 |
| 35 | <i>Geobacillus thermoglucosidasius</i> C56-YS93                          | 0.000243957 |
| 36 | <i>Geobacter lovleyi</i> SZ                                              | 0.000368481 |
| 37 | <i>Geobacter metallireducens</i> GS-15                                   | 0.000602051 |
| 38 | <i>Geobacter</i> sp. FRC-32                                              | 0.000710776 |
| 39 | <i>Haemophilus influenzae</i> Rd KW20                                    | 0.000343967 |
| 40 | <i>Haemophilus parainfluenzae</i> T3T1                                   | 0.0004172   |
| 41 | <i>Rhodobacter capsulatus</i> SB 1003                                    | 0.00043359  |
| 42 | <i>Rickettsia heilongjiangensis</i> 054                                  | 0.00044147  |
| 43 | <i>Rickettsia peacockii</i> str. Rustic                                  | 0.000313373 |
| 44 | <i>Roseiflexus castenholzii</i> DSM 13941                                | 0.0015777   |
| 45 | <i>Roseobacter denitrificans</i> OCh 114                                 | 0.000430132 |
| 46 | <i>Ruegeria pomeroyi</i> DSS-3                                           | 0.000256555 |

|    |                               |                    |
|----|-------------------------------|--------------------|
| 47 | Salinispora arenicola CNS-205 | 0.000435634        |
| 48 | Shewanella amazonensis SB2B   | 0.000405258        |
| 49 | Sinorhizobium medicae WSM419  | 0.000490665        |
| 50 | Streptococcus suis ST3        | 0.0014154          |
|    | <b>Average distance</b>       | <b>0.000772183</b> |
