# Supplementary material for: A two-phase binning algorithm using l-mer frequency on groups of non-overlapping reads
Source: PubMed Central journal article supplement (PMC4304631; doi:10.1186/s13015-014-0030-4), 2015-01-16
Supplement: 13015_2014_30_MOESM2_ESM.pdf [file 13015_2014_30_MOESM2_ESM.pdf]

## Supplementary Materials 2

### The details of datasets and results for the observation of shared $q$ -mers between microbial genomes.

We conducted a test to observe the ratio of common  $q$ -mers in bacterial genomes. The dataset consists of 100 pairs of genomes from different genetic distances. The ratio of common  $q$ -mers in genomes of each pair is computed for different values of  $q$  as follows.

The ratio of common  $q$ -mers =  $nc/(nd_1 + nd_2 - nc)$ .

In which,  $nc$  be the number of common  $q$ -mers in two genomes,  $nd_1$  be the number of distinct  $q$ -mers in the first genome, and  $nd_2$  be the number of distinct  $q$ -mers in the second genome. The figure below presents the average ratio of common  $q$ -mers with different values of  $q$ .

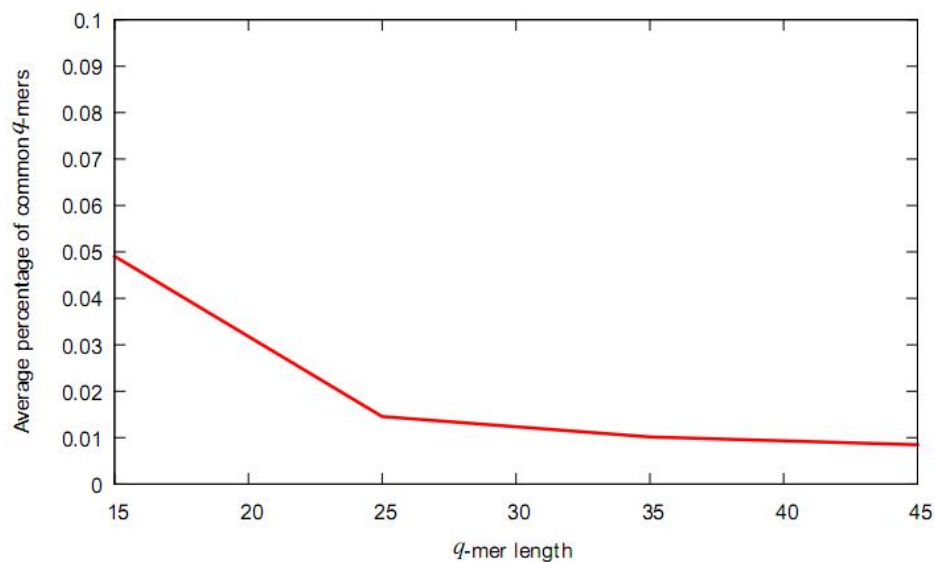

### The details of datasets and results of this experiment

| Pairs | Species/Strains           | Ratio of common $l$ -mers |          |          |          |
|-------|---------------------------|---------------------------|----------|----------|----------|
|       |                           | $l=15$                    | $l=25$   | $l=35$   | $l=45$   |
| 1     | Acidiphilium cryptum JF-5 | 0.053591                  | 0.000826 | 0.000256 | 0.000145 |
|       | Azospirillum lipoferum 4B |                           |          |          |          |
| 2     | Acidiphilium cryptum JF-5 | 0.057112                  | 0.00087  | 0.00027  | 0.000168 |

|    |                                      |          |          |          |          |
|----|--------------------------------------|----------|----------|----------|----------|
|    | Azospirillum sp. B510                |          |          |          |          |
| 3  | Acidiphilium cryptum JF-5            |          |          |          |          |
|    | Rhodospirillum centenum SW           | 0.061575 | 0.000777 | 0.000231 | 0.000119 |
| 4  | Acidiphilium cryptum JF-5            |          |          |          |          |
|    | Rhodospirillum photometricum DSM 122 | 0.033701 | 0.000324 | 9.71E-05 | 5.78E-05 |
| 5  | Acidiphilium cryptum JF-5            |          |          |          |          |
|    | Rhodospirillum rubrum F11            | 0.049182 | 0.000429 | 0.000107 | 6.03E-05 |
| 6  | Acidiphilium multivorum AIU301       |          |          |          |          |
|    | Azospirillum lipoferum 4B            | 0.05344  | 0.000792 | 0.000242 | 0.000141 |
| 7  | Acidiphilium multivorum AIU301       |          |          |          |          |
|    | Azospirillum sp. B510                | 0.057072 | 0.000831 | 0.000254 | 0.000158 |
| 8  | Acidiphilium multivorum AIU301       |          |          |          |          |
|    | Rhodospirillum centenum SW           | 0.062018 | 0.000773 | 0.000227 | 0.000118 |
| 9  | Acidiphilium multivorum AIU301       |          |          |          |          |
|    | Rhodospirillum photometricum DSM 122 | 0.033991 | 0.000318 | 8.96E-05 | 5.33E-05 |
| 10 | Acidiphilium multivorum AIU301       |          |          |          |          |
|    | Rhodospirillum rubrum F11            | 0.049638 | 0.000428 | 0.000106 | 5.78E-05 |
| 11 | Gluconobacter oxydans 621H           |          |          |          |          |
|    | Magnetospirillum magneticum AMB-1    | 0.020886 | 0.000252 | 0.000104 | 7.24E-05 |
| 12 | Gluconobacter oxydans 621H           |          |          |          |          |
|    | Azospirillum lipoferum 4B            | 0.021329 | 0.0004   | 0.000168 | 0.000112 |
| 13 | Gluconobacter oxydans 621H           |          |          |          |          |
|    | Azospirillum sp. B510                | 0.021703 | 0.00035  | 0.000157 | 0.000106 |
| 14 | Gluconobacter oxydans 621H           |          |          |          |          |
|    | Rhodospirillum centenum SW           | 0.025319 | 0.000301 | 0.00012  | 8.15E-05 |
| 15 | Gluconobacter oxydans 621H           |          |          |          |          |
|    | Rhodospirillum photometricum DSM 122 | 0.015492 | 0.000218 | 9.66E-05 | 5.68E-05 |
| 16 | Gluconacetobacter xylinus NBRC 3288  |          |          |          |          |
|    | Magnetospirillum magneticum AMB-1    | 0.024037 | 0.000274 | 0.000107 | 7.04E-05 |
| 17 | Gluconacetobacter xylinus NBRC 3288  |          |          |          |          |
|    | Azospirillum lipoferum 4B            | 0.022314 | 0.000349 | 0.000154 | 0.000103 |
| 18 | Gluconacetobacter xylinus NBRC 3288  |          |          |          |          |
|    | Azospirillum sp. B510                | 0.022499 | 0.000322 | 0.000138 | 9.74E-05 |
| 19 | Gluconacetobacter xylinus NBRC 3288  |          |          |          |          |
|    | Rhodospirillum centenum SW           | 0.027084 | 0.000278 | 0.000122 | 8.19E-05 |
| 20 | Gluconacetobacter xylinus NBRC 3288  |          |          |          |          |
|    | Rhodospirillum photometricum DSM 122 | 0.018091 | 0.000209 | 9.41E-05 | 5.78E-05 |
| 21 | Helicobacter pylori v225d            | 0.010971 | 0.000308 | 0.000215 | 0.000167 |

|    |                                         |          |          |          |          |
|----|-----------------------------------------|----------|----------|----------|----------|
|    | Campylobacter concisus 13826            |          |          |          |          |
| 22 | Helicobacter pylori v225d               |          |          |          |          |
|    | Campylobacter curvus 525.92             | 0.008837 | 0.000305 | 0.000218 | 0.000174 |
| 23 | Helicobacter pylori v225d               |          |          |          |          |
|    | Campylobacter fetus subsp. fetus 82-40  | 0.011021 | 0.000336 | 0.000231 | 0.00019  |
| 24 | Helicobacter pylori v225d               |          |          |          |          |
|    | Campylobacter hominis ATCC BAA-381      | 0.014205 | 0.000305 | 0.00021  | 0.000166 |
| 25 | Helicobacter pylori v225d               |          |          |          |          |
|    | Campylobacter jejuni RM1221             | 0.017842 | 0.000373 | 0.00024  | 0.000187 |
| 26 | Helicobacter acinonychis str. Sheeba    |          |          |          |          |
|    | Campylobacter concisus 13826            | 0.011105 | 0.000311 | 0.000214 | 0.000165 |
| 27 | Helicobacter acinonychis str. Sheeba    |          |          |          |          |
|    | Campylobacter curvus 525.92             | 0.00879  | 0.000316 | 0.00022  | 0.000175 |
| 28 | Helicobacter acinonychis str. Sheeba    |          |          |          |          |
|    | Campylobacter fetus subsp. fetus 82-40  | 0.011383 | 0.000323 | 0.000218 | 0.00018  |
| 29 | Helicobacter acinonychis str. Sheeba    |          |          |          |          |
|    | Campylobacter hominis ATCC BAA-381      | 0.014715 | 0.000301 | 0.000201 | 0.000158 |
| 30 | Helicobacter acinonychis str. Sheeba    |          |          |          |          |
|    | Campylobacter jejuni RM1221             | 0.01857  | 0.000376 | 0.000232 | 0.000186 |
| 31 | Mycobacterium tuberculosis CCDC5079     |          |          |          |          |
|    | Corynebacterium aurimucosum ATCC 700975 | 0.016841 | 0.000246 | 0.000123 | 8.37E-05 |
| 32 | Mycobacterium tuberculosis CCDC5079     |          |          |          |          |
|    | Corynebacterium diphtheriae 241         | 0.008249 | 0.000233 | 0.000145 | 0.000109 |
| 33 | Mycobacterium tuberculosis CCDC5079     |          |          |          |          |
|    | Corynebacterium efficiens YS-314        | 0.023746 | 0.00032  | 0.000142 | 9.26E-05 |
| 34 | Mycobacterium tuberculosis CCDC5079     |          |          |          |          |
|    | Corynebacterium glutamicum ATCC 13032   | 0.010387 | 0.00022  | 0.000125 | 9.01E-05 |
| 35 | Mycobacterium tuberculosis CCDC5079     |          |          |          |          |
|    | Corynebacterium jeikeium K411           | 0.017647 | 0.000345 | 0.000156 | 0.00011  |
| 36 | Mycobacterium ulcerans Agy99            |          |          |          |          |
|    | Corynebacterium aurimucosum ATCC 700975 | 0.018194 | 0.000239 | 0.000104 | 7.26E-05 |
| 37 | Mycobacterium ulcerans Agy99            |          |          |          |          |
|    | Corynebacterium diphtheriae 241         | 0.008613 | 0.000212 | 0.000124 | 9.64E-05 |
| 38 | Mycobacterium ulcerans Agy99            |          |          |          |          |
|    | Corynebacterium efficiens YS-314        | 0.026133 | 0.000297 | 0.000123 | 8.20E-05 |
| 39 | Mycobacterium ulcerans Agy99            |          |          |          |          |
|    | Corynebacterium glutamicum ATCC 13032   | 0.011284 | 0.0002   | 0.000109 | 7.93E-05 |
| 40 | Mycobacterium ulcerans Agy99            | 0.018614 | 0.000316 | 0.000136 | 9.47E-05 |

|    |                                                                           |          |          |          |          |
|----|---------------------------------------------------------------------------|----------|----------|----------|----------|
|    | <i>Corynebacterium jeikeium</i> K411                                      |          |          |          |          |
| 41 | <i>Rhodococcus erythropolis</i> PR4                                       |          |          |          |          |
|    | <i>Mycobacterium abscessus</i>                                            | 0.032166 | 0.000654 | 0.000233 | 0.000142 |
| 42 | <i>Rhodococcus erythropolis</i> PR4                                       |          |          |          |          |
|    | <i>Mycobacterium africanum</i> GM041182                                   | 0.03059  | 0.000448 | 0.00016  | 0.000104 |
| 43 | <i>Rhodococcus erythropolis</i> PR4                                       |          |          |          |          |
|    | <i>Mycobacterium avium</i> 104                                            | 0.041997 | 0.000632 | 0.000201 | 0.000116 |
| 44 | <i>Rhodococcus erythropolis</i> PR4                                       |          |          |          |          |
|    | <i>Mycobacterium bovis</i> AF2122/97                                      | 0.030533 | 0.000448 | 0.00016  | 0.000104 |
| 45 | <i>Rhodococcus erythropolis</i> PR4                                       |          |          |          |          |
|    | <i>Mycobacterium canettii</i> CIPT 140010059                              | 0.030733 | 0.000442 | 0.000157 | 0.000103 |
| 46 | <i>Rhodococcus jostii</i> RHA1                                            |          |          |          |          |
|    | <i>Mycobacterium chubuense</i> NBB4                                       | 0.074817 | 0.001206 | 0.000359 | 0.000205 |
| 47 | <i>Rhodococcus jostii</i> RHA1                                            |          |          |          |          |
|    | <i>Clavibacter michiganensis</i><br>subsp. <i>michiganensis</i> NCPPB 382 | 0.063935 | 0.000391 | 0.00011  | 6.37E-05 |
| 48 | <i>Rhodococcus jostii</i> RHA1                                            |          |          |          |          |
|    | <i>Clavibacter michiganensis</i><br>subsp. <i>sepedonicus</i>             | 0.062386 | 0.000382 | 0.000113 | 6.06E-05 |
| 49 | <i>Rhodococcus jostii</i> RHA1                                            |          |          |          |          |
|    | <i>Microbacterium testaceum</i> StLB037                                   | 0.064757 | 0.000372 | 0.000102 | 5.82E-05 |
| 50 | <i>Rhodococcus jostii</i> RHA1                                            |          |          |          |          |
|    | <i>Mycobacterium avium</i> 104                                            | 0.072491 | 0.001038 | 0.000296 | 0.000157 |
| 51 | <i>Arthrobacter aurescens</i> TC1                                         |          |          |          |          |
|    | <i>Aromatoleum aromaticum</i> EbN1                                        | 0.020229 | 3.41E-05 | 8.42E-06 | 4.04E-06 |
| 52 | <i>Acidithiobacillus caldus</i> SM-1                                      |          |          |          |          |
|    | <i>Acidithiobacillus ferrivorans</i> SS3                                  | 0.014139 | 0.001115 | 0.00061  | 0.00046  |
| 53 | <i>Acinetobacter baumannii</i> TCDC-AB0715                                |          |          |          |          |
|    | <i>Acinetobacter calcoaceticus</i> PHEA-2                                 | 0.131116 | 0.063645 | 0.040039 | 0.031063 |
| 54 | <i>Acinetobacter baumannii</i> TCDC-AB0715                                |          |          |          |          |
|    | <i>Acinetobacter oleivorans</i> DR1                                       | 0.109767 | 0.04701  | 0.02748  | 0.020587 |
| 55 | <i>Acinetobacter oleivorans</i> DR1                                       |          |          |          |          |
|    | <i>Acinetobacter calcoaceticus</i> PHEA-2                                 | 0.195388 | 0.104095 | 0.067349 | 0.053325 |
| 56 | <i>Actinobacillus pleuropneumoniae</i><br>serovar 3 str. JL03             |          |          |          |          |
|    | <i>Actinobacillus succinogenes</i> 130Z                                   | 0.017256 | 0.002073 | 0.001075 | 0.000782 |
| 57 | <i>Clostridium tetani</i> E88                                             |          |          |          |          |
|    | <i>Clostridium thermocellum</i> ATCC 27405                                | 0.019823 | 0.00012  | 5.34E-05 | 2.81E-05 |

|    |                                                                        |          |          |          |          |
|----|------------------------------------------------------------------------|----------|----------|----------|----------|
| 58 | <i>Corynebacterium aurimucosum</i> ATCC 700975                         | 0.010625 | 0.001267 | 0.000691 | 0.000492 |
|    | <i>Corynebacterium diphtheriae</i> 241                                 |          |          |          |          |
| 59 | <i>Clostridium acetobutylicum</i> ATCC 824                             | 0.048906 | 0.000492 | 0.000162 | 9.77E-05 |
|    | <i>Clostridium beijerinckii</i> NCIMB 8052                             |          |          |          |          |
| 60 | <i>Clostridium beijerinckii</i> NCIMB 8052                             | 0.058419 | 0.000481 | 0.000164 | 9.81E-05 |
|    | <i>Clostridium botulinum</i> A str. ATCC 19397                         |          |          |          |          |
| 61 | <i>Clostridium botulinum</i> H04402 065                                | 0.025429 | 9.62E-05 | 3.41E-05 | 1.23E-05 |
|    | <i>Clostridium cellulolyticum</i> H10                                  |          |          |          |          |
| 62 | <i>Clostridium clariflavum</i> DSM 19732                               | 0.031506 | 7.69E-05 | 3.49E-05 | 2.09E-05 |
|    | <i>Clostridium difficile</i> 2007855                                   |          |          |          |          |
| 63 | <i>Clostridium difficile</i> 2007855                                   | 0.04432  | 0.000107 | 3.02E-05 | 1.53E-05 |
|    | <i>Clostridium kluveri</i> DSM 555                                     |          |          |          |          |
| 64 | <i>Clostridium kluveri</i> DSM 555                                     | 0.027807 | 7.20E-05 | 2.29E-05 | 8.88E-06 |
|    | <i>Clostridium lentocellum</i> DSM 5427                                |          |          |          |          |
| 65 | <i>Ehrlichia canis</i> str. Jake                                       | 0.052207 | 0.011644 | 0.004454 | 0.002793 |
|    | <i>Ehrlichia chaffeensis</i> str. Arkansas                             |          |          |          |          |
| 66 | <i>Ehrlichia chaffeensis</i> str. Arkansas                             | 0.032025 | 0.00378  | 0.001544 | 0.001131 |
|    | <i>Ehrlichia ruminantium</i> str. Gardel                               |          |          |          |          |
| 67 | <i>Enterobacter aerogenes</i> KCTC 2190                                | 0.041591 | 0.008314 | 0.004209 | 0.002998 |
|    | <i>Enterobacter asburiae</i> LF7a                                      |          |          |          |          |
| 68 | <i>Enterobacter cloacae</i> EcWSU1                                     | 0.090464 | 0.0354   | 0.021166 | 0.0163   |
|    | <i>Enterobacter asburiae</i> LF7a                                      |          |          |          |          |
| 69 | <i>Leuconostoc kimchii</i> IMSNU 11154                                 | 0.027991 | 0.010982 | 0.008471 | 0.007466 |
|    | <i>Leuconostoc mesenteroides</i> subsp. <i>mesenteroides</i> ATCC 8293 |          |          |          |          |
| 70 | <i>Lactobacillus amylovorus</i> GRL 1112                               | 0.00601  | 0.000326 | 0.000176 | 0.000114 |
|    | <i>Lactobacillus brevis</i> ATCC 367                                   |          |          |          |          |
| 71 | <i>Ferrimonas balearica</i> DSM 9799                                   | 0.002619 | 6.25E-07 | 0        | 0        |
|    | <i>Ferroglobus placidus</i> DSM 10642                                  |          |          |          |          |
| 72 | <i>Fervidococcus fontis</i> Kam940                                     | 0.001235 | 1.81E-06 | 0        | 0        |
|    | <i>Ferrimonas balearica</i> DSM 9799                                   |          |          |          |          |
| 73 | <i>Fervidobacterium nodosum</i> Rt17-B1                                | 0.022471 | 0.008456 | 0.007644 | 0.007329 |
|    | <i>Fervidobacterium pennivorans</i> DSM 9078                           |          |          |          |          |
| 74 | <i>Frankia alni</i> ACN14a                                             | 0.099534 | 0.002669 | 0.000972 | 0.000586 |
|    | <i>Frankia</i> symbiont of <i>Datisca glomerata</i>                    |          |          |          |          |
| 75 | <i>Flavobacterium branchiophilum</i> FL-15                             | 8.34E-05 | 0        | 0        | 0        |
|    | <i>Flavobacterium columnare</i> ATCC 49512                             |          |          |          |          |
| 76 | <i>Flavobacterium columnare</i> ATCC 49512                             | 0.037122 | 0.001369 | 0.000592 | 0.000403 |

|    |                                                            |          |          |          |          |
|----|------------------------------------------------------------|----------|----------|----------|----------|
|    | Flavobacterium indicum GPTSA100-9                          |          |          |          |          |
| 77 | Flavobacterium psychrophilum JIP02/86                      |          |          |          |          |
|    | Flavobacterium indicum GPTSA100-9                          | 0.033162 | 0.000947 | 0.000371 | 0.000251 |
| 78 | Francisella cf. novicida Fx1                               |          |          |          |          |
|    | Francisella noatunensis<br>subsp. orientalis str. Toba 04  | 0.049798 | 0.012356 | 0.005969 | 0.004085 |
| 79 | Francisella noatunensis<br>subsp. orientalis str. Toba 04  |          |          |          |          |
|    | Francisella philomiragia<br>subsp. philomiragia ATCC 25017 | 0.23284  | 0.130136 | 0.083074 | 0.06448  |
| 80 | Francisella philomiragia<br>subsp. philomiragia ATCC 25017 |          |          |          |          |
|    | Francisella cf. novicida Fx1                               | 0.060274 | 0.021076 | 0.013198 | 0.010466 |
| 81 | Gallibacterium anatis UMN179                               |          |          |          |          |
|    | Gallionella capsiferiformans ES-2                          | 0.005335 | 6.91E-05 | 2.72E-05 | 1.49E-05 |
| 82 | Geobacillus kaustophilus HTA426                            |          |          |          |          |
|    | Geobacillus sp. C56-T3                                     | 0.460798 | 0.374116 | 0.318441 | 0.29044  |
| 83 | Geobacillus sp. C56-T3                                     |          |          |          |          |
|    | Geobacillus thermodenitrificans NG80-2                     | 0.053992 | 0.013658 | 0.006336 | 0.00451  |
| 84 | Geobacillus thermodenitrificans NG80-2                     |          |          |          |          |
|    | Geobacillus thermoglucosidasius C56-YS93                   | 0.023635 | 0.004094 | 0.002642 | 0.002211 |
| 85 | Geobacillus thermoglucosidasius C56-YS93                   |          |          |          |          |
|    | Geobacillus thermoleovorans CCB_US3_UF5                    | 0.023909 | 0.00392  | 0.002439 | 0.002019 |
| 86 | Geobacter lovleyi SZ                                       |          |          |          |          |
|    | Geobacter metallireducens GS-15                            | 0.014598 | 0.000679 | 0.000303 | 0.000217 |
| 87 | Geobacter metallireducens GS-15                            |          |          |          |          |
|    | Geobacter sp. FRC-32                                       | 0.017985 | 0.00117  | 0.000451 | 0.000283 |
| 88 | Geobacter sp. FRC-32                                       |          |          |          |          |
|    | Geobacter sulfurreducens KN400                             | 0.016685 | 0.00083  | 0.000341 | 0.000227 |
| 89 | Haemophilus influenzae Rd KW20                             |          |          |          |          |
|    | Haemophilus parainfluenzae T3T1                            | 0.034913 | 0.00966  | 0.005387 | 0.003994 |
| 90 | Haemophilus parainfluenzae T3T1                            |          |          |          |          |
|    | Haemophilus parasuis SH0165                                | 0.016895 | 0.002411 | 0.00124  | 0.000908 |
| 91 | Rhodobacter capsulatus SB 1003                             |          |          |          |          |
|    | Rhodobacter sphaeroides 2.4.1                              | 0.06446  | 0.003134 | 0.000955 | 0.000492 |
| 92 | Rickettsia heilongjiangensis 054                           |          |          |          |          |
|    | Rickettsia massiliae MTU5                                  | 0.523623 | 0.382843 | 0.29407  | 0.253271 |
| 93 | Rickettsia peacockii str. Rustic                           | 0.089304 | 0.028678 | 0.012143 | 0.007651 |

|                |                                           |          |          |          |          |
|----------------|-------------------------------------------|----------|----------|----------|----------|
|                | <i>Rickettsia prowazekii</i> Rp22         |          |          |          |          |
| 94             | <i>Roseiflexus castenholzii</i> DSM 13941 |          |          |          |          |
|                | <i>Roseiflexus</i> sp. RS-1               | 0.056443 | 0.005    | 0.001435 | 0.000773 |
| 95             | <i>Roseobacter denitrificans</i> OCh 114  |          |          |          |          |
|                | <i>Roseobacter litoralis</i> Och 149      | 0.1204   | 0.053303 | 0.03071  | 0.022734 |
| 96             | <i>Ruegeria pomeroyi</i> DSS-3            |          |          |          |          |
|                | <i>Ruegeria</i> sp. TM1040                | 0.032634 | 0.002204 | 0.000799 | 0.00051  |
| 97             | <i>Salinispora arenicola</i> CNS-205      |          |          |          |          |
|                | <i>Salinispora tropica</i> CNB-440        | 0.144206 | 0.037764 | 0.018762 | 0.013013 |
| 98             | <i>Shewanella amazonensis</i> SB2B        |          |          |          |          |
|                | <i>Shewanella baltica</i> BA175           | 0.014119 | 0.001281 | 0.000608 | 0.000433 |
| 99             | <i>Sinorhizobium medicae</i> WSM419       |          |          |          |          |
|                | <i>Sinorhizobium meliloti</i> 1021        | 0.113863 | 0.037104 | 0.017663 | 0.011952 |
| 100            | <i>Streptococcus suis</i> ST3             |          |          |          |          |
|                | <i>Streptococcus thermophilus</i> ND03    | 0.012741 | 0.002262 | 0.001327 | 0.000989 |
| <b>Average</b> |                                           | 0.049063 | 0.014535 | 0.010142 | 0.008477 |
