# Supplementary material for: A two-phase binning algorithm using l-mer frequency on groups of non-overlapping reads
Source: PubMed Central journal article supplement (PMC4304631; doi:10.1186/s13015-014-0030-4), 2015-01-16
Supplement: 13015_2014_30_MOESM3_ESM.pdf [file 13015_2014_30_MOESM3_ESM.pdf]

# Supplementary Materials 3

## Table of Contents

1. Details of long read datasets
2. Details of short read datasets
3. Execution time of BiMeta, AbundanceBin and MetaCluster 5.0 on samples from L1 to L6.

### 1. Details of long read datasets

| ID | Species/Strain                         | Coverage |
|----|----------------------------------------|----------|
| R1 | Bacillus halodurans C-125              | 7        |
|    | Bacillus subtilis BSn5                 | 7        |
| R2 | Gluconobacter oxydans 621H             | 7        |
|    | Granulibacter bethesdensis CGDNIH1     | 7        |
| R3 | Escherichia coli LF82                  | 7        |
|    | Yersinia pestis Z176003                | 7        |
| R4 | Methanocaldococcus jannaschii DSM 2661 | 7        |
|    | Methanococcus maripaludis C5           | 7        |
| R5 | Pyrobaculum aerophilum str. IM2        | 7        |
|    | Thermofilum pendens Hrk 5              | 7        |
| R6 | Gluconobacter oxydans 621H             | 7        |
|    | Rhodospirillum rubrum F11              | 7        |
| R7 | Gluconobacter oxydans 621H             | 5        |
|    | Granulibacter bethesdensis CGDNIH1     | 5        |
|    | Nitrobacter hamburgensis X14           | 40       |
| R8 | Escherichia coli UM146                 | 5        |
|    | Pseudomonas putida BIRD-1              | 5        |
|    | Bacillus anthracis str. H9401          | 40       |
| R9 | Escherichia coli HS                    | 5        |
|    | Pseudomonas putida F1                  | 5        |
|    | Thermofilum pendens Hrk 5              | 5        |
|    | Pyrobaculum aerophilum str. IM2        | 5        |
|    | Bacillus anthracis str. H9401          | 10       |
|    | Bacillus subtilis BSn5                 | 70       |

## 2. Details of short read datasets

| ID                               | Species/Strain                                      | Coverage |
|----------------------------------|-----------------------------------------------------|----------|
| S1                               | Mycoplasma suis KI3806                              | 10       |
|                                  | Mycoplasma putrefaciens KS1                         | 10       |
| S2                               | Lactobacillus salivarius UCC118                     | 10       |
|                                  | Lactobacillus sanfranciscensis TMW 1.1304           | 10       |
| S3                               | Lactobacillus salivarius UCC118                     | 10       |
|                                  | Bacillus selenitireducens MLS10                     | 10       |
| S4                               | Borrelia burgdorferi JD1                            | 10       |
|                                  | Escherichia coli APEC O1                            | 10       |
| S5                               | Lactobacillus salivarius UCC118                     | 10       |
|                                  | Lactobacillus sanfranciscensis TMW 1.1304           | 10       |
|                                  | Aerococcus urinae ACS-120-V-Col10a                  | 10       |
| S6                               | Borrelia burgdorferi JD1                            | 30       |
|                                  | Thermofilum pendens Hrk 5                           | 20       |
|                                  | Escherichia coli APEC O1                            | 10       |
| S7                               | Actinobacillus pleuropneumoniae serovar 5b str. L20 | 10       |
|                                  | Aliivibrio salmonicida LFI1238                      | 10       |
|                                  | Haemophilus somnus 129PT                            | 10       |
|                                  | Pasteurella multocida 36950                         | 40       |
|                                  | Vibrio cholerae M66-2                               | 40       |
| S8                               | Haemophilus somnus 129PT                            | 3        |
|                                  | Pasteurella multocida 36950                         | 5        |
|                                  | Actinobacillus pleuropneumoniae serovar 5b str. L20 | 7        |
|                                  | Vibrio cholerae M66-2                               | 9        |
|                                  | Aliivibrio salmonicida LFI1238                      | 11       |
| S9                               | Azospirillum sp. B510                               | 5        |
|                                  | Bacillus amyloliquefaciens LL3                      | 5        |
|                                  | Bartonella clarridgeiae 73                          | 5        |
|                                  | Bifidobacterium animalis subsp. lactis B420         | 5        |
|                                  | Bordetella avium 197N                               | 5        |
|                                  | Caldicellulosiruptor lactoaceticus 6A               | 10       |
|                                  | Desulfovibrio vulgaris DP4                          | 10       |
|                                  | Ehrlichia canis str. Jake                           | 10       |
|                                  | Geobacter sulfurreducens PCA                        | 10       |
|                                  | Haemophilus somnus 2336                             | 10       |
| Helicobacter cetorum MIT 00-7128 | 15                                                  |          |

|                                 |                                              |    |
|---------------------------------|----------------------------------------------|----|
|                                 | Lactobacillus amylovorus GRL1118             | 15 |
|                                 | Mesotoga prima MesG1.Ag.4.2                  | 15 |
|                                 | Rickettsia akari str. Hartford               | 15 |
|                                 | Streptococcus thermophilus JIM 8232          | 15 |
| S10                             | Acidaminococcus intestini RyC-MR95           | 4  |
|                                 | Acinetobacter baumannii ATCC 17978           | 4  |
|                                 | Advenella kashmirensis WT001                 | 4  |
|                                 | Alicyclophilus denitrificans K601            | 4  |
|                                 | Anaeromyxobacter sp. Fw109-5                 | 4  |
|                                 | Bacillus amyloliquefaciens Y2                | 6  |
|                                 | Bacteroides fragilis NCTC 9343               | 6  |
|                                 | Bifidobacterium animalis subsp. lactis AD011 | 6  |
|                                 | Borrelia afzelii Pko                         | 6  |
|                                 | Borrelia turicatae 91E135                    | 6  |
|                                 | Burkholderia ambifaria AMMD                  | 7  |
|                                 | Caldicellulosiruptor owensensis OL           | 7  |
|                                 | Candidatus Amoebophilus asiaticus 5a2        | 7  |
|                                 | Chelativorans sp. BNC1                       | 7  |
|                                 | Clostridium cellulolyticum H10               | 7  |
|                                 | Coxiella burnetii RSA 331                    | 8  |
|                                 | Dechlorosoma suillum PS                      | 8  |
|                                 | Desulfitobacterium hafniense Y51             | 8  |
|                                 | Edwardsiella ictaluri 93-146                 | 8  |
|                                 | Erwinia amylovora ATCC 49946                 | 8  |
|                                 | Escherichia coli DH1                         | 9  |
|                                 | Ferrimonas balearica DSM 9799                | 9  |
|                                 | Finegoldia magna ATCC 29328                  | 9  |
|                                 | Fluviicola taffensis DSM 16823               | 9  |
|                                 | Frankia sp. CcI3                             | 9  |
|                                 | Gallibacterium anatis UMN179                 | 10 |
|                                 | Geobacillus sp. C56-T3                       | 10 |
|                                 | Geobacter sp. FRC-32                         | 10 |
| Gordonia polyisoprenivorans VH2 | 10                                           |    |
| Haemophilus ducreyi 35000HP     | 10                                           |    |
| L1                              | Eubacterium eligens ATCC 27750               | 7  |
|                                 | Lactobacillus amylovorus GRL1118             | 7  |
| L2                              | Eubacterium eligens ATCC 27750               | 7  |
|                                 | Lactobacillus amylovorus GRL1118             | 14 |
| L3                              | Eubacterium eligens ATCC 27750               | 7  |
|                                 | Lactobacillus amylovorus GRL1118             | 21 |
| L4                              | Eubacterium eligens ATCC 27750               | 7  |

|    |                                  |    |
|----|----------------------------------|----|
|    | Lactobacillus amylovorus GRL1118 | 28 |
| L5 | Eubacterium eligens ATCC 27750   | 7  |
|    | Lactobacillus amylovorus GRL1118 | 35 |
| L6 | Eubacterium eligens ATCC 27750   | 7  |
|    | Lactobacillus amylovorus GRL1118 | 42 |

**3. Execution time of BiMeta, AbundanceBin and MetaCluster 5.0 on samples from L1 to L6.**

| <b>Samples</b> | <b>MC 5.0<br/>(Second)</b> | <b>AbundanceBin<br/>(Second)</b> | <b>BiMeta<br/>(Second)</b> |
|----------------|----------------------------|----------------------------------|----------------------------|
| L1             | 502.41                     | 266                              | <b>198.44</b>              |
| L2             | 508.57                     | 504                              | <b>254.35</b>              |
| L3             | 555.7                      | 436                              | <b>338.14</b>              |
| L4             | 572.24                     | 516                              | <b>424.98</b>              |
| L5             | 607.55                     | 652                              | <b>510.02</b>              |
| L6             | 645.85                     | 724                              | <b>631.53</b>              |
